# Supplementary material for: Hydrothermal co-liquefaction of biomasses – quantitative analysis of bio-crude and aqueous phase composition
Source: Royal Society of Chemistry journal article supplement (doi:10.1039/c7se00104e), 2017-01-01

## Supplementary material

### Hydrothermal Co-liquefaction of Biomasses – Quantitative Analysis of Bio-crude and Aqueous Phase Composition

René B. Madsen, Rikke Bernberg, Patrick Biller, Jacob Becker, Bo B. Iversen, Marianne Glasius

Department of Chemistry and iNANO, Aarhus University, Langelandsgade 140, 8000 Aarhus C, Denmark

Table S1 – Elemental distribution in bio-crude from HTL of model compounds. Carbohydrate (cellulose:hemicellulose 3:1), protein (soya protein), lipid (unrefined rapeseed oil)

|                            | C [%] | H [%] | N [%] | S [%] | O [%] |
|----------------------------|-------|-------|-------|-------|-------|
| Carbohydrate               | 78.49 | 7.38  | 0.10  | 0.17  | 13.87 |
| Protein                    | 76.11 | 9.28  | 5.75  | 0.89  | 7.97  |
| Carbohydrate:Lipid         | 77.11 | 11.04 | 0.09  | 0.09  | 11.68 |
| Protein:Lipid              | 70.34 | 10.93 | 2.67  | 0.27  | 15.79 |
| Carbohydrate:Protein       | 77.30 | 8.82  | 5.63  | 0.49  | 7.76  |
| Carbohydrate:Protein:Lipid | 75.59 | 10.53 | 2.76  | 0.19  | 10.93 |

Figure S2 – Normalized peak areas of monoglycerides

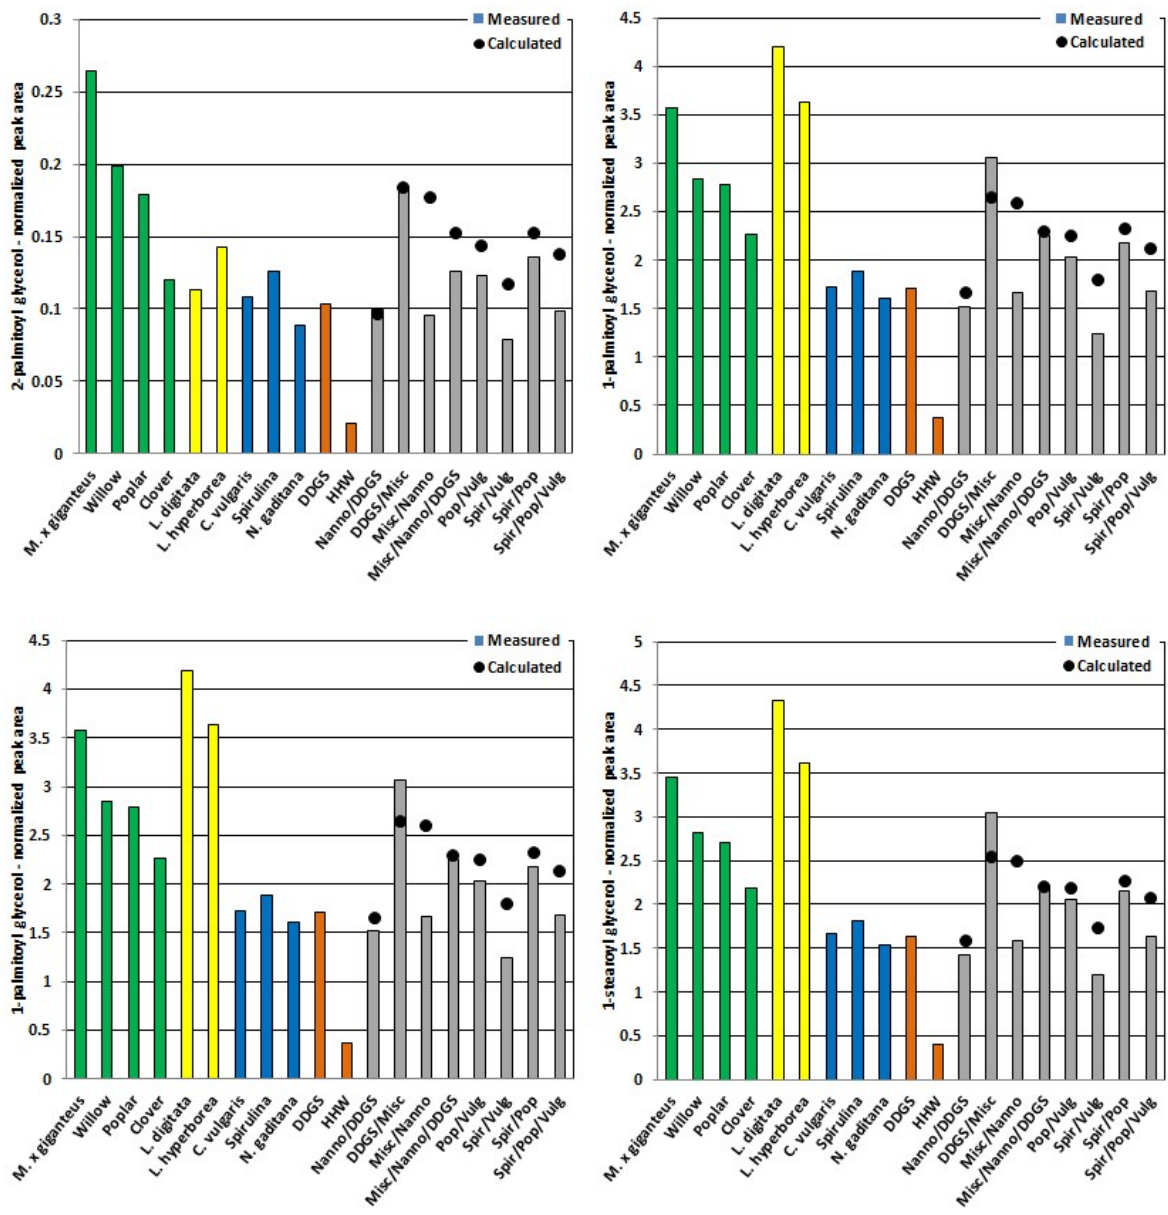

Table S3 – Compounds quantitated in the aqueous phase

| <b><i>Small organic acids</i></b> | <b><i>Fatty acids</i></b>          |
|-----------------------------------|------------------------------------|
| acetic acid                       | tetradecanoic acid                 |
| isobutyric acid                   | palmitoleic acid                   |
| methacrylic acid                  | palmitic acid                      |
| butyric acid                      | linoleic acid                      |
| crotonic acid                     | oleic acid                         |
| isovaleric acid                   | stearic acid                       |
| pent-4-enoic acid                 | <b><i>Oxygenated aromatics</i></b> |
| pent-3-enoic acid                 | benzoic acid                       |
| valeric acid                      | phenol                             |
| tiglic acid                       | phenyl acetic acid                 |
| 3-methylbut-2-enoic acid          | m-cresol                           |
| 3-methylpentanoic acid            | p-cresol                           |
| 4-methylpentanoic acid            | hydrocinnamic acid                 |
| 5-hexenoic acid                   | <b><i>Cyclic oxygenates</i></b>    |
| 3-methylpent-2-enoic acid         | cyclopentanone                     |
| 3-methylpent-3-enoic acid         | 2-methylcyclopent-2-enone          |
| 2-methylpent-2-enoic acid         | butyrolactone                      |
| levulinic acid                    | 3-methylcyclopent-2-enone          |
| 4-oxohexanoic acid                | 2,3-dimethylcyclopent-2-enone      |
| 4-methylpent-3-enoic acid         | $\delta$ -valerolactone            |
| 5-oxohexanoic acid                | 3,4-dimethylcyclopentenone         |
| octanoic acid                     | (?,?)-dimethylcyclopentenone       |
| dodecanoic acid                   | 4,4-dimethylcyclopentenone         |
| oxalic acid                       | 3-ethylcyclopent-2-enone           |
| malonic acid                      | <b><i>Nitrogenates</i></b>         |
| succinic acid                     | pyrazine                           |
| methylsuccinic acid               | methylpyrazine                     |
| glutaric acid                     | 2,5-dimethylpyrazine               |
| ethylsuccinic acid                | ethylpyrazine                      |
| adipic acid                       | 2,3-dimethylpyrazine               |
| 2-oxoglutaric acid                | 2,3,5-trimethylpyrazine            |
| propantricarboxylic acid          | 2-pyrrolidone                      |
|                                   | 3-hydroxypyridine, monoacetate     |
|                                   | 3-hydroxypyridine                  |

Figure S4 – Measured and calculated concentrations of small organic acids, fatty acids, oxygenated aromatics, and cyclic oxygenates quantitated in aqueous phase from HTL of mixtures of biomass.

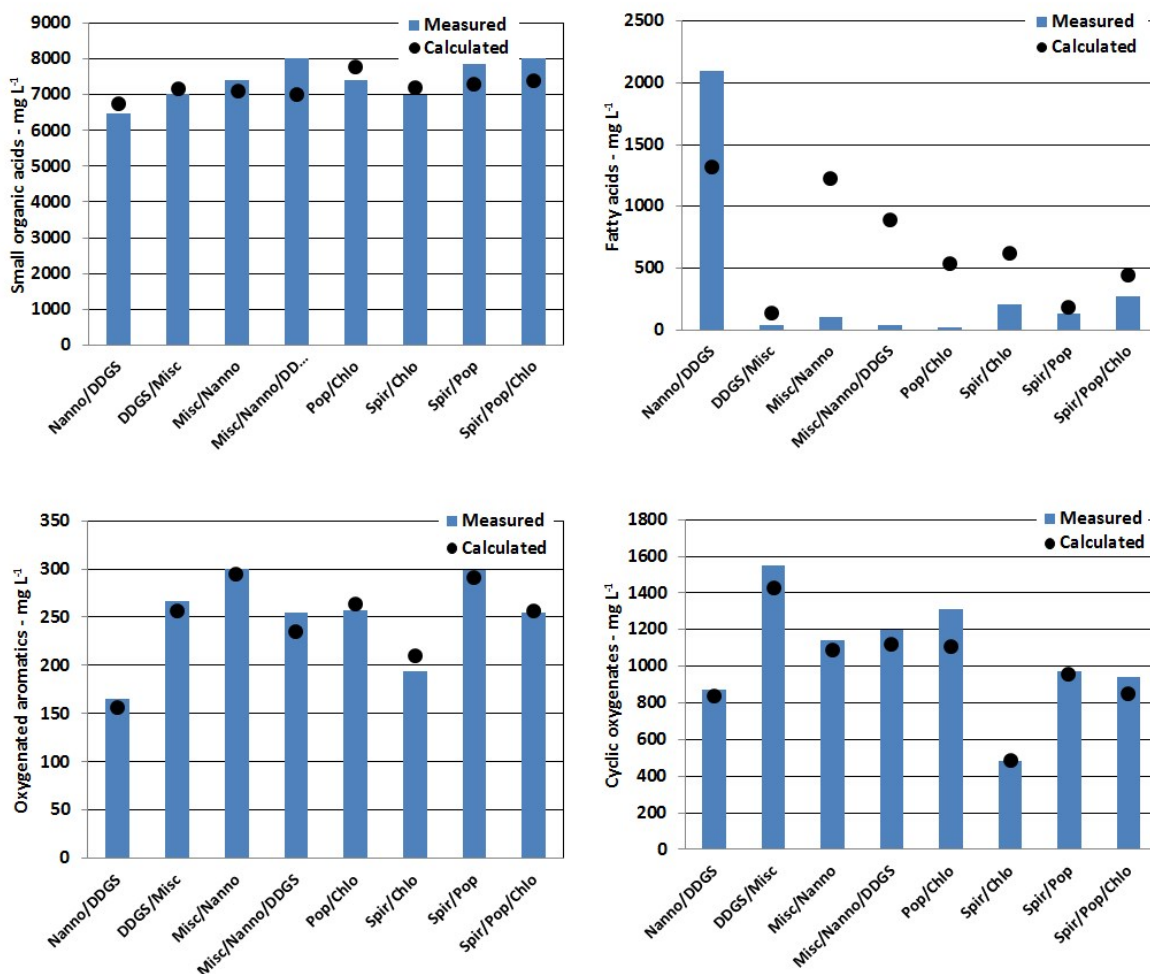

Supplement: c7se00104e1.pdf [file c7se00104e1.pdf]
